# Supplementary material for: A Large Collection of Novel Nematode-Infecting Microsporidia and Their Diverse Interactions with Caenorhabditis elegans and Other Related Nematodes
Source: PLoS Pathog. 2016 Dec 12;12(12):e1006093. doi: 10.1371/journal.ppat.1006093 (PMC5179134; doi:10.1371/journal.ppat.1006093)
Supplement: S2 Table — (XLSX) [file ppat.1006093.s009.xlsx]

## Sheet: MatrixOutput
	SSU rDNA pairwise distances of all the sequences used for phylogenetic analysis in Figure 2 and genetic distances in Table 2
	Strain name / species name {species name / clade name}	1	2	3	4	5	6	7	8	9	10	11	12	13	14	15	16	17	18	19	20	21	22	23	24	25	26	27	28	29	30	31	32	33	34	35	36	37	38	39	40	41	42	43	44	45	46	47	48
1	ERTm1_{N._parisii}		0	0	0	0	0	0	0	0	0	0	0	0	0	0	0	0	0.00649122	0.00649122	0.00649122	0.00649122	0.00649122	0.00649122	0.00649122	0.00649122	0.00649122	0.00703816	0.0231865	0.0231865	0.0231865	0.0268274	0.0268274	0.0249643	0.029732	0.029732	0.0251591	0.0439161	0.0470332	0.0477011	0.0488984	0.0472712	0.0576886	0.0563606	0.0553838	0.0553838	0.050852	0.0518048	0.050852
2	ERTm3_{N._parisii}	0		0	0	0	0	0	0	0	0	0	0	0	0	0	0	0	0.00649122	0.00649122	0.00649122	0.00649122	0.00649122	0.00649122	0.00649122	0.00649122	0.00649122	0.00703816	0.0231865	0.0231865	0.0231865	0.0268274	0.0268274	0.0249643	0.029732	0.029732	0.0251591	0.0439161	0.0470332	0.0477011	0.0488984	0.0472712	0.0576886	0.0563606	0.0553838	0.0553838	0.050852	0.0518048	0.050852
3	ERTm4_{N._parisii}	0	0		0	0	0	0	0	0	0	0	0	0	0	0	0	0	0.00649122	0.00649122	0.00649122	0.00649122	0.00649122	0.00649122	0.00649122	0.00649122	0.00649122	0.00703816	0.0231865	0.0231865	0.0231865	0.0268274	0.0268274	0.0249643	0.029732	0.029732	0.0251591	0.0439161	0.0470332	0.0477011	0.0488984	0.0472712	0.0576886	0.0563606	0.0553838	0.0553838	0.050852	0.0518048	0.050852
4	ERTm5_{N._parisii}	0	0	0		0	0	0	0	0	0	0	0	0	0	0	0	0	0.00649122	0.00649122	0.00649122	0.00649122	0.00649122	0.00649122	0.00649122	0.00649122	0.00649122	0.00703816	0.0231865	0.0231865	0.0231865	0.0268274	0.0268274	0.0249643	0.029732	0.029732	0.0251591	0.0439161	0.0470332	0.0477011	0.0488984	0.0472712	0.0576886	0.0563606	0.0553838	0.0553838	0.050852	0.0518048	0.050852
5	JUm1248_{N._parisii}	0	0	0	0		0	0	0	0	0	0	0	0	0	0	0	0	0.00649122	0.00649122	0.00649122	0.00649122	0.00649122	0.00649122	0.00649122	0.00649122	0.00649122	0.00703816	0.0231865	0.0231865	0.0231865	0.0268274	0.0268274	0.0249643	0.029732	0.029732	0.0251591	0.0439161	0.0470332	0.0477011	0.0488984	0.0472712	0.0576886	0.0563606	0.0553838	0.0553838	0.050852	0.0518048	0.050852
6	JUm1249_{N._parisii}	0	0	0	0	0		0	0	0	0	0	0	0	0	0	0	0	0.00649122	0.00649122	0.00649122	0.00649122	0.00649122	0.00649122	0.00649122	0.00649122	0.00649122	0.00703816	0.0231865	0.0231865	0.0231865	0.0268274	0.0268274	0.0249643	0.029732	0.029732	0.0251591	0.0439161	0.0470332	0.0477011	0.0488984	0.0472712	0.0576886	0.0563606	0.0553838	0.0553838	0.050852	0.0518048	0.050852
7	JUm1253_{N._parisii}	0	0	0	0	0	0		0	0	0	0	0	0	0	0	0	0	0.00649122	0.00649122	0.00649122	0.00649122	0.00649122	0.00649122	0.00649122	0.00649122	0.00649122	0.00703816	0.0231865	0.0231865	0.0231865	0.0268274	0.0268274	0.0249643	0.029732	0.029732	0.0251591	0.0439161	0.0470332	0.0477011	0.0488984	0.0472712	0.0576886	0.0563606	0.0553838	0.0553838	0.050852	0.0518048	0.050852
8	JUm1254_{N._parisii}	0	0	0	0	0	0	0		0	0	0	0	0	0	0	0	0	0.00649122	0.00649122	0.00649122	0.00649122	0.00649122	0.00649122	0.00649122	0.00649122	0.00649122	0.00703816	0.0231865	0.0231865	0.0231865	0.0268274	0.0268274	0.0249643	0.029732	0.029732	0.0251591	0.0439161	0.0470332	0.0477011	0.0488984	0.0472712	0.0576886	0.0563606	0.0553838	0.0553838	0.050852	0.0518048	0.050852
9	JUm2131_{N._parisii}	0	0	0	0	0	0	0	0		0	0	0	0	0	0	0	0	0.00649122	0.00649122	0.00649122	0.00649122	0.00649122	0.00649122	0.00649122	0.00649122	0.00649122	0.00703816	0.0231865	0.0231865	0.0231865	0.0268274	0.0268274	0.0249643	0.029732	0.029732	0.0251591	0.0439161	0.0470332	0.0477011	0.0488984	0.0472712	0.0576886	0.0563606	0.0553838	0.0553838	0.050852	0.0518048	0.050852
10	JUm2132_{N._parisii}	0	0	0	0	0	0	0	0	0		0	0	0	0	0	0	0	0.00649122	0.00649122	0.00649122	0.00649122	0.00649122	0.00649122	0.00649122	0.00649122	0.00649122	0.00703816	0.0231865	0.0231865	0.0231865	0.0268274	0.0268274	0.0249643	0.029732	0.029732	0.0251591	0.0439161	0.0470332	0.0477011	0.0488984	0.0472712	0.0576886	0.0563606	0.0553838	0.0553838	0.050852	0.0518048	0.050852
11	JUm1762_{N._parisii}	0	0	0	0	0	0	0	0	0	0		0	0	0	0	0	0	0.00649122	0.00649122	0.00649122	0.00649122	0.00649122	0.00649122	0.00649122	0.00649122	0.00649122	0.00703816	0.0231865	0.0231865	0.0231865	0.0268274	0.0268274	0.0249643	0.029732	0.029732	0.0251591	0.0439161	0.0470332	0.0477011	0.0488984	0.0472712	0.0576886	0.0563606	0.0553838	0.0553838	0.050852	0.0518048	0.050852
12	JUm1893_{N._parisii}	0	0	0	0	0	0	0	0	0	0	0		0	0	0	0	0	0.00649122	0.00649122	0.00649122	0.00649122	0.00649122	0.00649122	0.00649122	0.00649122	0.00649122	0.00703816	0.0231865	0.0231865	0.0231865	0.0268274	0.0268274	0.0249643	0.029732	0.029732	0.0251591	0.0439161	0.0470332	0.0477011	0.0488984	0.0472712	0.0576886	0.0563606	0.0553838	0.0553838	0.050852	0.0518048	0.050852
13	JUm2106_{N._parisii}	0	0	0	0	0	0	0	0	0	0	0	0		0	0	0	0	0.00649122	0.00649122	0.00649122	0.00649122	0.00649122	0.00649122	0.00649122	0.00649122	0.00649122	0.00703816	0.0231865	0.0231865	0.0231865	0.0268274	0.0268274	0.0249643	0.029732	0.029732	0.0251591	0.0439161	0.0470332	0.0477011	0.0488984	0.0472712	0.0576886	0.0563606	0.0553838	0.0553838	0.050852	0.0518048	0.050852
14	JUm2287_{N._parisii}	0	0	0	0	0	0	0	0	0	0	0	0	0		0	0	0	0.00649122	0.00649122	0.00649122	0.00649122	0.00649122	0.00649122	0.00649122	0.00649122	0.00649122	0.00703816	0.0231865	0.0231865	0.0231865	0.0268274	0.0268274	0.0249643	0.029732	0.029732	0.0251591	0.0439161	0.0470332	0.0477011	0.0488984	0.0472712	0.0576886	0.0563606	0.0553838	0.0553838	0.050852	0.0518048	0.050852
15	JUm2590_{N._parisii}	0	0	0	0	0	0	0	0	0	0	0	0	0	0		0	0	0.00649122	0.00649122	0.00649122	0.00649122	0.00649122	0.00649122	0.00649122	0.00649122	0.00649122	0.00703816	0.0231865	0.0231865	0.0231865	0.0268274	0.0268274	0.0249643	0.029732	0.029732	0.0251591	0.0439161	0.0470332	0.0477011	0.0488984	0.0472712	0.0576886	0.0563606	0.0553838	0.0553838	0.050852	0.0518048	0.050852
16	JUm2793_{N._parisii}	0	0	0	0	0	0	0	0	0	0	0	0	0	0	0		0	0.00649122	0.00649122	0.00649122	0.00649122	0.00649122	0.00649122	0.00649122	0.00649122	0.00649122	0.00703816	0.0231865	0.0231865	0.0231865	0.0268274	0.0268274	0.0249643	0.029732	0.029732	0.0251591	0.0439161	0.0470332	0.0477011	0.0488984	0.0472712	0.0576886	0.0563606	0.0553838	0.0553838	0.050852	0.0518048	0.050852
17	JUm2816_{N._parisii}	0	0	0	0	0	0	0	0	0	0	0	0	0	0	0	0		0.00649122	0.00649122	0.00649122	0.00649122	0.00649122	0.00649122	0.00649122	0.00649122	0.00649122	0.00703816	0.0231865	0.0231865	0.0231865	0.0268274	0.0268274	0.0249643	0.029732	0.029732	0.0251591	0.0439161	0.0470332	0.0477011	0.0488984	0.0472712	0.0576886	0.0563606	0.0553838	0.0553838	0.050852	0.0518048	0.050852
18	JUm2799_{N._ausubeli}	0.0165295	0.0165295	0.0165295	0.0165295	0.0165295	0.0165295	0.0165295	0.0165295	0.0165295	0.0165295	0.0165295	0.0165295	0.0165295	0.0165295	0.0165295	0.0165295	0.0165295		0	0	0	0	0	0	0	0	0.00260802	0.0256136	0.0256136	0.0256136	0.0277527	0.0277527	0.0267561	0.0306873	0.0306873	0.0269034	0.0424859	0.045659	0.0461461	0.0474645	0.0461339	0.0570801	0.0556922	0.0546802	0.0546802	0.049527	0.0504042	0.049527
19	ERTm6_{N._ausubeli}	0.0165295	0.0165295	0.0165295	0.0165295	0.0165295	0.0165295	0.0165295	0.0165295	0.0165295	0.0165295	0.0165295	0.0165295	0.0165295	0.0165295	0.0165295	0.0165295	0.0165295	0		0	0	0	0	0	0	0	0.00260802	0.0256136	0.0256136	0.0256136	0.0277527	0.0277527	0.0267561	0.0306873	0.0306873	0.0269034	0.0424859	0.045659	0.0461461	0.0474645	0.0461339	0.0570801	0.0556922	0.0546802	0.0546802	0.049527	0.0504042	0.049527
20	JUm2586_{N._ausubeli}	0.0165295	0.0165295	0.0165295	0.0165295	0.0165295	0.0165295	0.0165295	0.0165295	0.0165295	0.0165295	0.0165295	0.0165295	0.0165295	0.0165295	0.0165295	0.0165295	0.0165295	0	0		0	0	0	0	0	0	0.00260802	0.0256136	0.0256136	0.0256136	0.0277527	0.0277527	0.0267561	0.0306873	0.0306873	0.0269034	0.0424859	0.045659	0.0461461	0.0474645	0.0461339	0.0570801	0.0556922	0.0546802	0.0546802	0.049527	0.0504042	0.049527
21	JUm2671_{N._ausubeli}	0.0165295	0.0165295	0.0165295	0.0165295	0.0165295	0.0165295	0.0165295	0.0165295	0.0165295	0.0165295	0.0165295	0.0165295	0.0165295	0.0165295	0.0165295	0.0165295	0.0165295	0	0	0		0	0	0	0	0	0.00260802	0.0256136	0.0256136	0.0256136	0.0277527	0.0277527	0.0267561	0.0306873	0.0306873	0.0269034	0.0424859	0.045659	0.0461461	0.0474645	0.0461339	0.0570801	0.0556922	0.0546802	0.0546802	0.049527	0.0504042	0.049527
22	JUm2526_{N._ausubeli}	0.0165295	0.0165295	0.0165295	0.0165295	0.0165295	0.0165295	0.0165295	0.0165295	0.0165295	0.0165295	0.0165295	0.0165295	0.0165295	0.0165295	0.0165295	0.0165295	0.0165295	0	0	0	0		0	0	0	0	0.00260802	0.0256136	0.0256136	0.0256136	0.0277527	0.0277527	0.0267561	0.0306873	0.0306873	0.0269034	0.0424859	0.045659	0.0461461	0.0474645	0.0461339	0.0570801	0.0556922	0.0546802	0.0546802	0.049527	0.0504042	0.049527
23	JUm2520_{N._ausubeli}	0.0165295	0.0165295	0.0165295	0.0165295	0.0165295	0.0165295	0.0165295	0.0165295	0.0165295	0.0165295	0.0165295	0.0165295	0.0165295	0.0165295	0.0165295	0.0165295	0.0165295	0	0	0	0	0		0	0	0	0.00260802	0.0256136	0.0256136	0.0256136	0.0277527	0.0277527	0.0267561	0.0306873	0.0306873	0.0269034	0.0424859	0.045659	0.0461461	0.0474645	0.0461339	0.0570801	0.0556922	0.0546802	0.0546802	0.049527	0.0504042	0.049527
24	JUm2009_{N._ausubeli}	0.0165295	0.0165295	0.0165295	0.0165295	0.0165295	0.0165295	0.0165295	0.0165295	0.0165295	0.0165295	0.0165295	0.0165295	0.0165295	0.0165295	0.0165295	0.0165295	0.0165295	0	0	0	0	0	0		0	0	0.00260802	0.0256136	0.0256136	0.0256136	0.0277527	0.0277527	0.0267561	0.0306873	0.0306873	0.0269034	0.0424859	0.045659	0.0461461	0.0474645	0.0461339	0.0570801	0.0556922	0.0546802	0.0546802	0.049527	0.0504042	0.049527
25	JUm2825_{N._ausubeli}	0.0165295	0.0165295	0.0165295	0.0165295	0.0165295	0.0165295	0.0165295	0.0165295	0.0165295	0.0165295	0.0165295	0.0165295	0.0165295	0.0165295	0.0165295	0.0165295	0.0165295	0	0	0	0	0	0	0		0	0.00260802	0.0256136	0.0256136	0.0256136	0.0277527	0.0277527	0.0267561	0.0306873	0.0306873	0.0269034	0.0424859	0.045659	0.0461461	0.0474645	0.0461339	0.0570801	0.0556922	0.0546802	0.0546802	0.049527	0.0504042	0.049527
26	ERTm2_{N._ausubeli}	0.0165295	0.0165295	0.0165295	0.0165295	0.0165295	0.0165295	0.0165295	0.0165295	0.0165295	0.0165295	0.0165295	0.0165295	0.0165295	0.0165295	0.0165295	0.0165295	0.0165295	0	0	0	0	0	0	0	0		0.00260802	0.0256136	0.0256136	0.0256136	0.0277527	0.0277527	0.0267561	0.0306873	0.0306873	0.0269034	0.0424859	0.045659	0.0461461	0.0474645	0.0461339	0.0570801	0.0556922	0.0546802	0.0546802	0.049527	0.0504042	0.049527
27	JUm2796_{N._ausubeli}	0.0193841	0.0193841	0.0193841	0.0193841	0.0193841	0.0193841	0.0193841	0.0193841	0.0193841	0.0193841	0.0193841	0.0193841	0.0193841	0.0193841	0.0193841	0.0193841	0.0193841	0.0027027	0.0027027	0.0027027	0.0027027	0.0027027	0.0027027	0.0027027	0.0027027	0.0027027		0.0261583	0.0261583	0.0261583	0.0283111	0.0283111	0.0273314	0.0313229	0.0313229	0.0274968	0.0433992	0.0468776	0.0473669	0.0487584	0.0472794	0.0583853	0.0569241	0.0558499	0.0558499	0.0507242	0.0516323	0.0507242
28	JUm2507_{N._major}	0.137788	0.137788	0.137788	0.137788	0.137788	0.137788	0.137788	0.137788	0.137788	0.137788	0.137788	0.137788	0.137788	0.137788	0.137788	0.137788	0.137788	0.153598	0.153598	0.153598	0.153598	0.153598	0.153598	0.153598	0.153598	0.153598	0.157961		0	0	0.0213929	0.0213929	0.0233934	0.0253059	0.0253059	0.0218307	0.0337513	0.0485129	0.0504664	0.0517425	0.0476927	0.0599433	0.0583131	0.0619391	0.0619391	0.0559992	0.0573762	0.0559992
29	JUm2751_{N._major}	0.137788	0.137788	0.137788	0.137788	0.137788	0.137788	0.137788	0.137788	0.137788	0.137788	0.137788	0.137788	0.137788	0.137788	0.137788	0.137788	0.137788	0.153598	0.153598	0.153598	0.153598	0.153598	0.153598	0.153598	0.153598	0.153598	0.157961	0		0	0.0213929	0.0213929	0.0233934	0.0253059	0.0253059	0.0218307	0.0337513	0.0485129	0.0504664	0.0517425	0.0476927	0.0599433	0.0583131	0.0619391	0.0619391	0.0559992	0.0573762	0.0559992
30	JUm2747_{N._major}	0.137788	0.137788	0.137788	0.137788	0.137788	0.137788	0.137788	0.137788	0.137788	0.137788	0.137788	0.137788	0.137788	0.137788	0.137788	0.137788	0.137788	0.153598	0.153598	0.153598	0.153598	0.153598	0.153598	0.153598	0.153598	0.153598	0.157961	0	0		0.0213929	0.0213929	0.0233934	0.0253059	0.0253059	0.0218307	0.0337513	0.0485129	0.0504664	0.0517425	0.0476927	0.0599433	0.0583131	0.0619391	0.0619391	0.0559992	0.0573762	0.0559992
31	JUm1510_{N._minor}	0.163255	0.163255	0.163255	0.163255	0.163255	0.163255	0.163255	0.163255	0.163255	0.163255	0.163255	0.163255	0.163255	0.163255	0.163255	0.163255	0.163255	0.168747	0.168747	0.168747	0.168747	0.168747	0.168747	0.168747	0.168747	0.168747	0.173232	0.121137	0.121137	0.121137		0	0.0170682	0.0229001	0.0229001	0.0190763	0.0355415	0.0416045	0.043144	0.0440098	0.0427453	0.0608821	0.0590411	0.0586193	0.0586193	0.0576343	0.0586994	0.0576343
32	JUm2772_{N._minor}	0.163255	0.163255	0.163255	0.163255	0.163255	0.163255	0.163255	0.163255	0.163255	0.163255	0.163255	0.163255	0.163255	0.163255	0.163255	0.163255	0.163255	0.168747	0.168747	0.168747	0.168747	0.168747	0.168747	0.168747	0.168747	0.168747	0.173232	0.121137	0.121137	0.121137	0		0.0170682	0.0229001	0.0229001	0.0190763	0.0355415	0.0416045	0.043144	0.0440098	0.0427453	0.0608821	0.0590411	0.0586193	0.0586193	0.0576343	0.0586994	0.0576343
33	JUm2807_{N._displodere}	0.150947	0.150947	0.150947	0.150947	0.150947	0.150947	0.150947	0.150947	0.150947	0.150947	0.150947	0.150947	0.150947	0.150947	0.150947	0.150947	0.150947	0.164909	0.164909	0.164909	0.164909	0.164909	0.164909	0.164909	0.164909	0.164909	0.169363	0.141977	0.141977	0.141977	0.0815192	0.0815192		0.0116392	0.0116392	0.00977288	0.0281955	0.0352225	0.0363733	0.0370759	0.0372157	0.0546239	0.0533401	0.0525922	0.0525922	0.0508763	0.0516638	0.0508763
34	JUm1504_{N._homospo}	0.181715	0.181715	0.181715	0.181715	0.181715	0.181715	0.181715	0.181715	0.181715	0.181715	0.181715	0.181715	0.181715	0.181715	0.181715	0.181715	0.181715	0.187815	0.187815	0.187815	0.187815	0.187815	0.187815	0.187815	0.187815	0.187815	0.192594	0.153598	0.153598	0.153598	0.121577	0.121577	0.0434151		0	0.0139569	0.0289837	0.037868	0.0390234	0.0397075	0.0406009	0.0544921	0.0532595	0.0526273	0.0526273	0.0516319	0.0521016	0.0516319
35	NICm516_{N._homospo}	0.181715	0.181715	0.181715	0.181715	0.181715	0.181715	0.181715	0.181715	0.181715	0.181715	0.181715	0.181715	0.181715	0.181715	0.181715	0.181715	0.181715	0.187815	0.187815	0.187815	0.187815	0.187815	0.187815	0.187815	0.187815	0.187815	0.192594	0.153598	0.153598	0.153598	0.121577	0.121577	0.0434151	0		0.0139569	0.0289837	0.037868	0.0390234	0.0397075	0.0406009	0.0544921	0.0532595	0.0526273	0.0526273	0.0516319	0.0521016	0.0516319
36	JUm2895_{N._ciargi}	0.150947	0.150947	0.150947	0.150947	0.150947	0.150947	0.150947	0.150947	0.150947	0.150947	0.150947	0.150947	0.150947	0.150947	0.150947	0.150947	0.150947	0.164909	0.164909	0.164909	0.164909	0.164909	0.164909	0.164909	0.164909	0.164909	0.169363	0.129576	0.129576	0.129576	0.095784	0.095784	0.0339036	0.0619048	0.0619048		0.0289874	0.0334358	0.035192	0.0349553	0.0341485	0.050408	0.0492526	0.048505	0.048505	0.0473218	0.0478305	0.0473218
37	Ovavesicula_popilliae_{clade_ii}	0.301948	0.301948	0.301948	0.301948	0.301948	0.301948	0.301948	0.301948	0.301948	0.301948	0.301948	0.301948	0.301948	0.301948	0.301948	0.301948	0.301948	0.292077	0.292077	0.292077	0.292077	0.292077	0.292077	0.292077	0.292077	0.292077	0.298077	0.221623	0.221623	0.221623	0.235449	0.235449	0.18047	0.189695	0.189695	0.18505		0.0355385	0.0355695	0.0365128	0.0378134	0.052843	0.052843	0.052843	0.052843	0.0502566	0.0510315	0.0502566
38	Paranosema_whitei_{clade_ii}	0.350793	0.350793	0.350793	0.350793	0.350793	0.350793	0.350793	0.350793	0.350793	0.350793	0.350793	0.350793	0.350793	0.350793	0.350793	0.350793	0.350793	0.340084	0.340084	0.340084	0.340084	0.340084	0.340084	0.340084	0.340084	0.340084	0.34682	0.344462	0.344462	0.344462	0.293166	0.293166	0.238082	0.251051	0.251051	0.219009	0.252622		0.00520835	0.00457361	0.0123286	0.0383257	0.0374619	0.0369052	0.0369052	0.0333099	0.0343204	0.0333099
39	Paranosema_grylli_{clade_ii}	0.35623	0.35623	0.35623	0.35623	0.35623	0.35623	0.35623	0.35623	0.35623	0.35623	0.35623	0.35623	0.35623	0.35623	0.35623	0.35623	0.35623	0.345411	0.345411	0.345411	0.345411	0.345411	0.345411	0.345411	0.345411	0.345411	0.352205	0.356773	0.356773	0.356773	0.304174	0.304174	0.24792	0.26123	0.26123	0.237163	0.257224	0.0109103		0.00453074	0.0131389	0.037799	0.0370198	0.03642	0.03642	0.0330784	0.0340713	0.0330784
40	Antonospora_locustae_{clade_ii}	0.363142	0.363142	0.363142	0.363142	0.363142	0.363142	0.363142	0.363142	0.363142	0.363142	0.363142	0.363142	0.363142	0.363142	0.363142	0.363142	0.363142	0.352205	0.352205	0.352205	0.352205	0.352205	0.352205	0.352205	0.352205	0.352205	0.359116	0.363866	0.363866	0.363866	0.310372	0.310372	0.253423	0.266996	0.266996	0.233705	0.262644	0.00816334	0.00815217		0.0115636	0.0381651	0.037348	0.0367451	0.0367451	0.0328021	0.0338765	0.0328021
41	Antonospora_scoticae_{clade_ii}	0.354872	0.354872	0.354872	0.354872	0.354872	0.354872	0.354872	0.354872	0.354872	0.354872	0.354872	0.354872	0.354872	0.354872	0.354872	0.354872	0.354872	0.344057	0.344057	0.344057	0.344057	0.344057	0.344057	0.344057	0.344057	0.344057	0.350793	0.341489	0.341489	0.341489	0.303036	0.303036	0.257967	0.277537	0.277537	0.232785	0.271306	0.049031	0.0549859	0.0457996		0.0416482	0.0406999	0.0419374	0.0419374	0.0377563	0.0389253	0.0377563
42	JUm408_{E._longa}	0.434853	0.434853	0.434853	0.434853	0.434853	0.434853	0.434853	0.434853	0.434853	0.434853	0.434853	0.434853	0.434853	0.434853	0.434853	0.434853	0.434853	0.434853	0.434853	0.434853	0.434853	0.434853	0.434853	0.434853	0.434853	0.434853	0.442469	0.446559	0.446559	0.446559	0.454532	0.454532	0.417314	0.4125	0.4125	0.383867	0.405152	0.293847	0.288836	0.288836	0.311012		0.0026266	0.00378982	0.00378982	0.0204053	0.0206707	0.0204053
43	JUm1456_{Enteropsectra}	0.427372	0.427372	0.427372	0.427372	0.427372	0.427372	0.427372	0.427372	0.427372	0.427372	0.427372	0.427372	0.427372	0.427372	0.427372	0.427372	0.427372	0.427372	0.427372	0.427372	0.427372	0.427372	0.427372	0.427372	0.427372	0.427372	0.434853	0.438731	0.438731	0.438731	0.446559	0.446559	0.409965	0.405152	0.405152	0.377015	0.405152	0.288301	0.283333	0.283333	0.3052	0.0027027		0.0046789	0.0046789	0.0207542	0.0209648	0.0207542
44	JUm1483_{Enteropsectra}	0.420024	0.420024	0.420024	0.420024	0.420024	0.420024	0.420024	0.420024	0.420024	0.420024	0.420024	0.420024	0.420024	0.420024	0.420024	0.420024	0.420024	0.420024	0.420024	0.420024	0.420024	0.420024	0.420024	0.420024	0.420024	0.420024	0.427372	0.462655	0.462655	0.462655	0.438731	0.438731	0.402746	0.397932	0.397932	0.370278	0.405152	0.28284	0.277914	0.277914	0.311012	0.00543478	0.00819672		0	0.0196379	0.0199105	0.0196379
45	JUm2551_{E._breve}	0.420024	0.420024	0.420024	0.420024	0.420024	0.420024	0.420024	0.420024	0.420024	0.420024	0.420024	0.420024	0.420024	0.420024	0.420024	0.420024	0.420024	0.420024	0.420024	0.420024	0.420024	0.420024	0.420024	0.420024	0.420024	0.420024	0.427372	0.462655	0.462655	0.462655	0.438731	0.438731	0.402746	0.397932	0.397932	0.370278	0.405152	0.28284	0.277914	0.277914	0.311012	0.00543478	0.00819672	0		0.0196379	0.0199105	0.0196379
46	JUm1460_{P._philotis}	0.38037	0.38037	0.38037	0.38037	0.38037	0.38037	0.38037	0.38037	0.38037	0.38037	0.38037	0.38037	0.38037	0.38037	0.38037	0.38037	0.38037	0.373458	0.373458	0.373458	0.373458	0.373458	0.373458	0.373458	0.373458	0.373458	0.38037	0.413948	0.413948	0.413948	0.422919	0.422919	0.374308	0.374308	0.374308	0.342757	0.382917	0.231319	0.23078	0.226909	0.262644	0.115194	0.118919	0.107882	0.107882		0.00454755	0
47	JUm1505_{P._philotis}	0.390839	0.390839	0.390839	0.390839	0.390839	0.390839	0.390839	0.390839	0.390839	0.390839	0.390839	0.390839	0.390839	0.390839	0.390839	0.390839	0.390839	0.383867	0.383867	0.383867	0.383867	0.383867	0.383867	0.383867	0.383867	0.383867	0.390839	0.42449	0.42449	0.42449	0.433847	0.433847	0.384283	0.379979	0.379979	0.352325	0.388706	0.240837	0.240268	0.236347	0.272878	0.118728	0.122477	0.11137	0.11137	0.0081634		0.00454755
48	JUm1670_{P._philotis}	0.38037	0.38037	0.38037	0.38037	0.38037	0.38037	0.38037	0.38037	0.38037	0.38037	0.38037	0.38037	0.38037	0.38037	0.38037	0.38037	0.38037	0.373458	0.373458	0.373458	0.373458	0.373458	0.373458	0.373458	0.373458	0.373458	0.38037	0.413948	0.413948	0.413948	0.422919	0.422919	0.374308	0.374308	0.374308	0.342757	0.382917	0.231319	0.23078	0.226909	0.262644	0.115194	0.118919	0.107882	0.107882	0	0.0081634
49	JUm2552_{P._philotis}	0.38616	0.38616	0.38616	0.38616	0.38616	0.38616	0.38616	0.38616	0.38616	0.38616	0.38616	0.38616	0.38616	0.38616	0.38616	0.38616	0.38616	0.379189	0.379189	0.379189	0.379189	0.379189	0.379189	0.379189	0.379189	0.379189	0.38616	0.420005	0.420005	0.420005	0.429102	0.429102	0.379979	0.368696	0.368696	0.348136	0.377189	0.2319	0.231319	0.227497	0.263462	0.111691	0.115393	0.104425	0.104425	0.00269906	0.00542009	0.00269906
50	JUm1396_{P._epiphaga}	0.459561	0.459561	0.459561	0.459561	0.459561	0.459561	0.459561	0.459561	0.459561	0.459561	0.459561	0.459561	0.459561	0.459561	0.459561	0.459561	0.459561	0.451587	0.451587	0.451587	0.451587	0.451587	0.451587	0.451587	0.451587	0.451587	0.459561	0.489869	0.489869	0.489869	0.451302	0.451302	0.454532	0.449649	0.449649	0.429102	0.43693	0.331759	0.324591	0.326484	0.338111	0.14086	0.145049	0.132648	0.132648	0.112137	0.115624	0.112137
51	Liebermannia_covasacrae_{Liebermannia}	0.401643	0.401643	0.401643	0.401643	0.401643	0.401643	0.401643	0.401643	0.401643	0.401643	0.401643	0.401643	0.401643	0.401643	0.401643	0.401643	0.401643	0.401643	0.401643	0.401643	0.401643	0.401643	0.401643	0.401643	0.401643	0.401643	0.408799	0.405152	0.405152	0.405152	0.402746	0.402746	0.346959	0.348932	0.348932	0.328211	0.362179	0.263967	0.259248	0.264545	0.269305	0.115194	0.118919	0.115194	0.115194	0.119683	0.12709	0.119683
52	Liebermannia_dichroplusae_{Liebermannia}	0.403916	0.403916	0.403916	0.403916	0.403916	0.403916	0.403916	0.403916	0.403916	0.403916	0.403916	0.403916	0.403916	0.403916	0.403916	0.403916	0.403916	0.403916	0.403916	0.403916	0.403916	0.403916	0.403916	0.403916	0.403916	0.403916	0.411199	0.393254	0.393254	0.393254	0.405152	0.405152	0.359985	0.348932	0.348932	0.323726	0.351137	0.263967	0.259248	0.264545	0.274724	0.122692	0.126514	0.122692	0.122692	0.127426	0.134984	0.127426
53	Liebermannia_patagonica_{Liebermannia}	0.408799	0.408799	0.408799	0.408799	0.408799	0.408799	0.408799	0.408799	0.408799	0.408799	0.408799	0.408799	0.408799	0.408799	0.408799	0.408799	0.408799	0.408799	0.408799	0.408799	0.408799	0.408799	0.408799	0.408799	0.408799	0.408799	0.416083	0.4125	0.4125	0.4125	0.409965	0.409965	0.353418	0.3555	0.3555	0.334358	0.368973	0.263967	0.259248	0.264545	0.269305	0.115194	0.118919	0.115194	0.115194	0.115886	0.123219	0.115886
54	Orthosomella_operophterae_{Orthosomella}	0.391887	0.391887	0.391887	0.391887	0.391887	0.391887	0.391887	0.391887	0.391887	0.391887	0.391887	0.391887	0.391887	0.391887	0.391887	0.391887	0.391887	0.391887	0.391887	0.391887	0.391887	0.391887	0.391887	0.391887	0.391887	0.391887	0.398739	0.423497	0.423497	0.423497	0.394611	0.394611	0.393636	0.388681	0.388681	0.361957	0.409965	0.283878	0.27897	0.27897	0.283878	0.090901	0.0944229	0.0839852	0.0839852	0.0907372	0.0940816	0.0907372
55	Endoreticulatus_schubergi_{clade_iv}	0.441253	0.441253	0.441253	0.441253	0.441253	0.441253	0.441253	0.441253	0.441253	0.441253	0.441253	0.441253	0.441253	0.441253	0.441253	0.441253	0.441253	0.441253	0.441253	0.441253	0.441253	0.441253	0.441253	0.441253	0.441253	0.441253	0.448939	0.453023	0.453023	0.453023	0.494824	0.494824	0.408799	0.423497	0.423497	0.403916	0.349964	0.300101	0.299479	0.299479	0.340607	0.176263	0.180508	0.176263	0.176263	0.206878	0.211165	0.206878
56	Vittaforma_corneae_{clade_iv}	0.485051	0.485051	0.485051	0.485051	0.485051	0.485051	0.485051	0.485051	0.485051	0.485051	0.485051	0.485051	0.485051	0.485051	0.485051	0.485051	0.485051	0.485051	0.485051	0.485051	0.485051	0.485051	0.485051	0.485051	0.485051	0.485051	0.493407	0.506941	0.506941	0.506941	0.534297	0.534297	0.450226	0.453023	0.453023	0.453023	0.361957	0.335212	0.328211	0.334358	0.372337	0.202298	0.206878	0.202298	0.202298	0.259834	0.260467	0.259834
57	Enterocytozoon_bieneusi_{clade_iv}	0.506094	0.506094	0.506094	0.506094	0.506094	0.506094	0.506094	0.506094	0.506094	0.506094	0.506094	0.506094	0.506094	0.506094	0.506094	0.506094	0.506094	0.491982	0.491982	0.491982	0.491982	0.491982	0.491982	0.491982	0.491982	0.491982	0.500417	0.505185	0.505185	0.505185	0.487987	0.487987	0.441675	0.483083	0.483083	0.457772	0.38037	0.342474	0.330788	0.337088	0.334358	0.177995	0.182418	0.186903	0.186903	0.242107	0.237628	0.242107
58	Enterocytozoon_salmonis_{clade_iv}	0.534297	0.534297	0.534297	0.534297	0.534297	0.534297	0.534297	0.534297	0.534297	0.534297	0.534297	0.534297	0.534297	0.534297	0.534297	0.534297	0.534297	0.519818	0.519818	0.519818	0.519818	0.519818	0.519818	0.519818	0.519818	0.519818	0.529118	0.565904	0.565904	0.565904	0.471696	0.471696	0.448414	0.491431	0.491431	0.435806	0.397356	0.307362	0.308189	0.308189	0.323726	0.167618	0.172042	0.158952	0.158952	0.235772	0.245371	0.235772
59	Oligosporidium_occidentalis_{clade_iv}	0.545138	0.545138	0.545138	0.545138	0.545138	0.545138	0.545138	0.545138	0.545138	0.545138	0.545138	0.545138	0.545138	0.545138	0.545138	0.545138	0.545138	0.545138	0.545138	0.545138	0.545138	0.545138	0.545138	0.545138	0.545138	0.545138	0.554628	0.532273	0.532273	0.532273	0.566455	0.566455	0.487967	0.500789	0.500789	0.487967	0.491849	0.400407	0.383009	0.379979	0.36461	0.373458	0.366664	0.373458	0.373458	0.49	0.496754	0.49
60	Nosema_ceranae_{clade_iv}	0.537692	0.537692	0.537692	0.537692	0.537692	0.537692	0.537692	0.537692	0.537692	0.537692	0.537692	0.537692	0.537692	0.537692	0.537692	0.537692	0.537692	0.537692	0.537692	0.537692	0.537692	0.537692	0.537692	0.537692	0.537692	0.537692	0.547086	0.539635	0.539635	0.539635	0.574196	0.574196	0.494824	0.516957	0.516957	0.494824	0.507749	0.418371	0.400407	0.397356	0.381612	0.390839	0.383867	0.390839	0.390839	0.496754	0.503583	0.496754
61	Nosema_vespula_{clade_iv}	0.530335	0.530335	0.530335	0.530335	0.530335	0.530335	0.530335	0.530335	0.530335	0.530335	0.530335	0.530335	0.530335	0.530335	0.530335	0.530335	0.530335	0.530335	0.530335	0.530335	0.530335	0.530335	0.530335	0.530335	0.530335	0.530335	0.539635	0.551252	0.551252	0.551252	0.58664	0.58664	0.505672	0.528695	0.528695	0.505672	0.519206	0.427833	0.409644	0.406331	0.390073	0.392014	0.384982	0.392014	0.392014	0.49	0.496754	0.49
62	Nosema_oulemae_{clade_iv}	0.521218	0.521218	0.521218	0.521218	0.521218	0.521218	0.521218	0.521218	0.521218	0.521218	0.521218	0.521218	0.521218	0.521218	0.521218	0.521218	0.521218	0.521218	0.521218	0.521218	0.521218	0.521218	0.521218	0.521218	0.521218	0.521218	0.530335	0.541667	0.541667	0.541667	0.576442	0.576442	0.514789	0.538379	0.538379	0.514789	0.509906	0.420005	0.402027	0.39885	0.382917	0.39917	0.392014	0.39917	0.39917	0.480792	0.487454	0.480792
63	Vairimorpha_necatrix_{clade_iv}	0.530335	0.530335	0.530335	0.530335	0.530335	0.530335	0.530335	0.530335	0.530335	0.530335	0.530335	0.530335	0.530335	0.530335	0.530335	0.530335	0.530335	0.530335	0.530335	0.530335	0.530335	0.530335	0.530335	0.530335	0.530335	0.530335	0.539635	0.532273	0.532273	0.532273	0.566455	0.566455	0.505672	0.528695	0.528695	0.505672	0.500789	0.412319	0.394546	0.391502	0.375884	0.39917	0.392014	0.39917	0.39917	0.480792	0.487454	0.480792
64	Nosema_bombi_{clade_iv}	0.554628	0.554628	0.554628	0.554628	0.554628	0.554628	0.554628	0.554628	0.554628	0.554628	0.554628	0.554628	0.554628	0.554628	0.554628	0.554628	0.554628	0.554628	0.554628	0.554628	0.554628	0.554628	0.554628	0.554628	0.554628	0.554628	0.564311	0.541667	0.541667	0.541667	0.576442	0.576442	0.496733	0.519206	0.519206	0.496733	0.509906	0.40477	0.387198	0.384283	0.368973	0.37807	0.371277	0.37807	0.37807	0.480792	0.487454	0.480792
65	Nosema_furnacalis_{clade_iv}	0.664481	0.664481	0.664481	0.664481	0.664481	0.664481	0.664481	0.664481	0.664481	0.664481	0.664481	0.664481	0.664481	0.664481	0.664481	0.664481	0.664481	0.676091	0.676091	0.676091	0.676091	0.676091	0.676091	0.676091	0.676091	0.676091	0.687966	0.661106	0.661106	0.661106	0.644442	0.644442	0.658333	0.641026	0.641026	0.619048	0.624251	0.565765	0.553147	0.548291	0.523065	0.531306	0.531306	0.531306	0.531306	0.64739	0.668352	0.64739
66	Nosema_bombycis_{clade_iv}	0.664481	0.664481	0.664481	0.664481	0.664481	0.664481	0.664481	0.664481	0.664481	0.664481	0.664481	0.664481	0.664481	0.664481	0.664481	0.664481	0.664481	0.676091	0.676091	0.676091	0.676091	0.676091	0.676091	0.676091	0.676091	0.676091	0.687966	0.678896	0.678896	0.678896	0.633454	0.633454	0.646978	0.658333	0.658333	0.619048	0.641026	0.556672	0.543786	0.539635	0.552675	0.505185	0.505185	0.505185	0.505185	0.623639	0.625245	0.623639
67	Nosema_apis_{clade_iv}	0.558442	0.558442	0.558442	0.558442	0.558442	0.558442	0.558442	0.558442	0.558442	0.558442	0.558442	0.558442	0.558442	0.558442	0.558442	0.558442	0.558442	0.558442	0.558442	0.558442	0.558442	0.558442	0.558442	0.558442	0.558442	0.558442	0.568027	0.545138	0.545138	0.545138	0.579872	0.579872	0.50878	0.521912	0.521912	0.50878	0.503676	0.403274	0.38571	0.382917	0.367788	0.390839	0.383867	0.390839	0.390839	0.482583	0.489285	0.482583
68	Encephalitozoon_cuniculi_{clade_iv}	0.454277	0.454277	0.454277	0.454277	0.454277	0.454277	0.454277	0.454277	0.454277	0.454277	0.454277	0.454277	0.454277	0.454277	0.454277	0.454277	0.454277	0.462105	0.462105	0.462105	0.462105	0.462105	0.462105	0.462105	0.462105	0.462105	0.470078	0.466174	0.466174	0.466174	0.438049	0.438049	0.374226	0.389727	0.389727	0.362775	0.44376	0.290062	0.274113	0.285119	0.280227	0.275982	0.270879	0.275982	0.275982	0.324591	0.329873	0.324591
69	Encephalitozoon_lacertae_{clade_iv}	0.442469	0.442469	0.442469	0.442469	0.442469	0.442469	0.442469	0.442469	0.442469	0.442469	0.442469	0.442469	0.442469	0.442469	0.442469	0.442469	0.442469	0.450226	0.450226	0.450226	0.450226	0.450226	0.450226	0.450226	0.450226	0.450226	0.458126	0.454532	0.454532	0.454532	0.426291	0.426291	0.363655	0.379189	0.379189	0.352465	0.424794	0.279574	0.273551	0.274724	0.275385	0.276713	0.271495	0.276713	0.276713	0.331759	0.337088	0.331759
70	Encephalitozoon_intestinalis_{clade_iv}	0.470078	0.470078	0.470078	0.470078	0.470078	0.470078	0.470078	0.470078	0.470078	0.470078	0.470078	0.470078	0.470078	0.470078	0.470078	0.470078	0.470078	0.478201	0.478201	0.478201	0.478201	0.478201	0.478201	0.478201	0.478201	0.478201	0.486478	0.466174	0.466174	0.466174	0.438049	0.438049	0.394611	0.411199	0.411199	0.380905	0.436073	0.295738	0.28093	0.290752	0.291492	0.282399	0.277062	0.282399	0.282399	0.329014	0.340607	0.329014
71	Sporanauta_perivermis_{clade_iv}	0.381828	0.381828	0.381828	0.381828	0.381828	0.381828	0.381828	0.381828	0.381828	0.381828	0.381828	0.381828	0.381828	0.381828	0.381828	0.381828	0.381828	0.388681	0.388681	0.388681	0.388681	0.388681	0.388681	0.388681	0.388681	0.388681	0.395652	0.371277	0.371277	0.371277	0.349964	0.349964	0.358977	0.367788	0.367788	0.322917	0.33824	0.277462	0.272576	0.272576	0.262523	0.219574	0.21493	0.219574	0.219574	0.250551	0.255169	0.250551
72	Loma_acerinae_{clade_iv}	0.435806	0.435806	0.435806	0.435806	0.435806	0.435806	0.435806	0.435806	0.435806	0.435806	0.435806	0.435806	0.435806	0.435806	0.435806	0.435806	0.435806	0.440291	0.440291	0.440291	0.440291	0.440291	0.440291	0.440291	0.440291	0.440291	0.448414	0.387198	0.387198	0.387198	0.388706	0.388706	0.378554	0.388747	0.388747	0.36461	0.367275	0.305868	0.306588	0.311012	0.317678	0.367659	0.367659	0.380905	0.380905	0.395652	0.401643	0.395652
73	Glugea_anomala_{clade_iv}	0.426128	0.426128	0.426128	0.426128	0.426128	0.426128	0.426128	0.426128	0.426128	0.426128	0.426128	0.426128	0.426128	0.426128	0.426128	0.426128	0.426128	0.430676	0.430676	0.430676	0.430676	0.430676	0.430676	0.430676	0.430676	0.430676	0.438576	0.400407	0.400407	0.400407	0.401841	0.401841	0.377189	0.387198	0.387198	0.356629	0.361724	0.335212	0.353418	0.353418	0.358977	0.354207	0.354207	0.366912	0.366912	0.416083	0.422269	0.416083
74	Pleistophora_typicalis_{clade_iii}	0.403916	0.403916	0.403916	0.403916	0.403916	0.403916	0.403916	0.403916	0.403916	0.403916	0.403916	0.403916	0.403916	0.403916	0.403916	0.403916	0.403916	0.408799	0.408799	0.408799	0.408799	0.408799	0.408799	0.408799	0.408799	0.408799	0.416083	0.393254	0.393254	0.393254	0.417314	0.417314	0.392014	0.401841	0.401841	0.364597	0.362179	0.320823	0.33824	0.326143	0.316211	0.342452	0.342452	0.354848	0.354848	0.393636	0.399639	0.393636
75	Trachipleistophora_hominis_{clade_iii}	0.415303	0.415303	0.415303	0.415303	0.415303	0.415303	0.415303	0.415303	0.415303	0.415303	0.415303	0.415303	0.415303	0.415303	0.415303	0.415303	0.415303	0.419981	0.419981	0.419981	0.419981	0.419981	0.419981	0.419981	0.419981	0.419981	0.427597	0.390073	0.390073	0.390073	0.406454	0.406454	0.388706	0.39885	0.39885	0.361052	0.359061	0.295056	0.311726	0.300101	0.311012	0.31924	0.31924	0.330957	0.330957	0.374226	0.380047	0.374226
76	Vavraia_oncoperae_{clade_iii}	0.422919	0.422919	0.422919	0.422919	0.422919	0.422919	0.422919	0.422919	0.422919	0.422919	0.422919	0.422919	0.422919	0.422919	0.422919	0.422919	0.422919	0.4125	0.4125	0.4125	0.4125	0.4125	0.4125	0.4125	0.4125	0.4125	0.419981	0.412319	0.412319	0.412319	0.429102	0.429102	0.410755	0.421704	0.421704	0.381612	0.379979	0.302284	0.319363	0.307362	0.329014	0.330957	0.330957	0.343054	0.343054	0.387699	0.393636	0.387699
77	Pleistophora_mirandellae_{clade_iii}	0.419981	0.419981	0.419981	0.419981	0.419981	0.419981	0.419981	0.419981	0.419981	0.419981	0.419981	0.419981	0.419981	0.419981	0.419981	0.419981	0.419981	0.432411	0.432411	0.432411	0.432411	0.432411	0.432411	0.432411	0.432411	0.432411	0.440168	0.42449	0.42449	0.42449	0.449649	0.449649	0.415303	0.442076	0.442076	0.388706	0.403274	0.361052	0.37807	0.366664	0.352465	0.373424	0.373424	0.386784	0.386784	0.408799	0.422269	0.408799
78	Pleistophora_ovariae_{clade_iii}	0.449649	0.449649	0.449649	0.449649	0.449649	0.449649	0.449649	0.449649	0.449649	0.449649	0.449649	0.449649	0.449649	0.449649	0.449649	0.449649	0.449649	0.454532	0.454532	0.454532	0.454532	0.454532	0.454532	0.454532	0.454532	0.454532	0.462655	0.430676	0.430676	0.430676	0.456115	0.456115	0.429102	0.448414	0.448414	0.401841	0.40477	0.362179	0.379189	0.367788	0.346959	0.374226	0.374226	0.387699	0.387699	0.409965	0.423497	0.409965
79	Pleistophora_anguillarum_{clade_iii}	0.418371	0.418371	0.418371	0.418371	0.418371	0.418371	0.418371	0.418371	0.418371	0.418371	0.418371	0.418371	0.418371	0.418371	0.418371	0.418371	0.418371	0.422919	0.422919	0.422919	0.422919	0.422919	0.422919	0.422919	0.422919	0.422919	0.430676	0.392993	0.392993	0.392993	0.401841	0.401841	0.384283	0.39885	0.39885	0.363365	0.370217	0.3052	0.322163	0.310353	0.321465	0.347015	0.347015	0.35931	0.35931	0.380905	0.391887	0.380905
80	Microgemma_caulleryi_{clade_iii}	0.37807	0.37807	0.37807	0.37807	0.37807	0.37807	0.37807	0.37807	0.37807	0.37807	0.37807	0.37807	0.37807	0.37807	0.37807	0.37807	0.37807	0.376022	0.376022	0.376022	0.376022	0.376022	0.376022	0.376022	0.376022	0.376022	0.382816	0.335212	0.335212	0.335212	0.352465	0.352465	0.368973	0.38571	0.38571	0.362179	0.32551	0.336122	0.324591	0.341512	0.338971	0.369343	0.369343	0.382816	0.382816	0.4125	0.413868	0.4125
81	Tetramicra_brevifilum_{clade_iii}	0.384982	0.384982	0.384982	0.384982	0.384982	0.384982	0.384982	0.384982	0.384982	0.384982	0.384982	0.384982	0.384982	0.384982	0.384982	0.384982	0.384982	0.382816	0.382816	0.382816	0.382816	0.382816	0.382816	0.382816	0.382816	0.382816	0.389727	0.341512	0.341512	0.341512	0.358977	0.358977	0.362179	0.378554	0.378554	0.3555	0.331759	0.323726	0.312493	0.329014	0.326775	0.369343	0.369343	0.382816	0.382816	0.4125	0.413868	0.4125
82	Spraguea_lophii_{clade_iii}	0.387402	0.387402	0.387402	0.387402	0.387402	0.387402	0.387402	0.387402	0.387402	0.387402	0.387402	0.387402	0.387402	0.387402	0.387402	0.387402	0.387402	0.384982	0.384982	0.384982	0.384982	0.384982	0.384982	0.384982	0.384982	0.384982	0.392014	0.337088	0.337088	0.337088	0.374641	0.374641	0.371521	0.38571	0.38571	0.357816	0.32551	0.340607	0.33976	0.34606	0.325568	0.382816	0.382816	0.396759	0.396759	0.443254	0.441675	0.443254
83	Amblyospora_bracteata_{clade_iii}	0.543281	0.543281	0.543281	0.543281	0.543281	0.543281	0.543281	0.543281	0.543281	0.543281	0.543281	0.543281	0.543281	0.543281	0.543281	0.543281	0.543281	0.519457	0.519457	0.519457	0.519457	0.519457	0.519457	0.519457	0.519457	0.519457	0.528484	0.494914	0.494914	0.494914	0.46474	0.46474	0.442469	0.458126	0.458126	0.393636	0.343054	0.403997	0.391113	0.397907	0.409416	0.460903	0.460903	0.460903	0.460903	0.397907	0.391887	0.397907
84	Nadelspora_canceri_{clade_iii}	0.707399	0.707399	0.707399	0.707399	0.707399	0.707399	0.707399	0.707399	0.707399	0.707399	0.707399	0.707399	0.707399	0.707399	0.707399	0.707399	0.707399	0.707399	0.707399	0.707399	0.707399	0.707399	0.707399	0.707399	0.707399	0.707399	0.720424	0.622069	0.622069	0.622069	0.63873	0.63873	0.560662	0.591912	0.591912	0.535936	0.432411	0.482729	0.503513	0.498175	0.476851	0.549048	0.549048	0.549048	0.549048	0.649624	0.658333	0.649624
85	Polydispyrenia_simuli_{clade_i}	0.419981	0.419981	0.419981	0.419981	0.419981	0.419981	0.419981	0.419981	0.419981	0.419981	0.419981	0.419981	0.419981	0.419981	0.419981	0.419981	0.419981	0.415303	0.415303	0.415303	0.415303	0.415303	0.415303	0.415303	0.415303	0.415303	0.422919	0.387402	0.387402	0.387402	0.364597	0.364597	0.311012	0.330788	0.330788	0.274113	0.238832	0.238102	0.252008	0.237807	0.267741	0.370868	0.377273	0.370868	0.370868	0.372687	0.378528	0.372687
86	Brachiola_algerae_{clade_?}	0.449649	0.449649	0.449649	0.449649	0.449649	0.449649	0.449649	0.449649	0.449649	0.449649	0.449649	0.449649	0.449649	0.449649	0.449649	0.449649	0.449649	0.444904	0.444904	0.444904	0.444904	0.444904	0.444904	0.444904	0.444904	0.444904	0.453027	0.430676	0.430676	0.430676	0.463179	0.463179	0.390073	0.412319	0.412319	0.371521	0.348932	0.382917	0.372885	0.384283	0.366664	0.459561	0.459561	0.475961	0.475961	0.52635	0.538607	0.52635
87	Flabelliforma_magnivora_{clade_?}	0.407822	0.407822	0.407822	0.407822	0.407822	0.407822	0.407822	0.407822	0.407822	0.407822	0.407822	0.407822	0.407822	0.407822	0.407822	0.407822	0.407822	0.395926	0.395926	0.395926	0.395926	0.395926	0.395926	0.395926	0.395926	0.395926	0.403274	0.42449	0.42449	0.42449	0.392014	0.392014	0.345702	0.363365	0.363365	0.339189	0.271306	0.258219	0.252673	0.262956	0.242406	0.376287	0.376287	0.376287	0.376287	0.380905	0.391887	0.380905
88	Nematocenator_marisprofundi_{clade_?}	0.394558	0.394558	0.394558	0.394558	0.394558	0.394558	0.394558	0.394558	0.394558	0.394558	0.394558	0.394558	0.394558	0.394558	0.394558	0.394558	0.394558	0.390073	0.390073	0.390073	0.390073	0.390073	0.390073	0.390073	0.390073	0.390073	0.397356	0.344057	0.344057	0.344057	0.326484	0.326484	0.273735	0.279412	0.279412	0.246629	0.246629	0.163255	0.175954	0.175954	0.178875	0.406672	0.399639	0.406672	0.406672	0.421704	0.432318	0.421704
89	Janacekia_debaisieuxi_{clade_v}	0.462724	0.462724	0.462724	0.462724	0.462724	0.462724	0.462724	0.462724	0.462724	0.462724	0.462724	0.462724	0.462724	0.462724	0.462724	0.462724	0.462724	0.45842	0.45842	0.45842	0.45842	0.45842	0.45842	0.45842	0.45842	0.45842	0.467102	0.407262	0.407262	0.407262	0.427197	0.427197	0.356773	0.385915	0.385915	0.339176	0.341513	0.335261	0.344015	0.347503	0.339176	0.445123	0.437366	0.461071	0.461071	0.552599	0.553551	0.552599
90	Kabatana_takedai_{clade_iii}	0.384982	0.384982	0.384982	0.384982	0.384982	0.384982	0.384982	0.384982	0.384982	0.384982	0.384982	0.384982	0.384982	0.384982	0.384982	0.384982	0.384982	0.384982	0.384982	0.384982	0.384982	0.384982	0.384982	0.384982	0.384982	0.384982	0.392014	0.383867	0.383867	0.383867	0.390839	0.390839	0.387402	0.420005	0.420005	0.38037	0.336122	0.366664	0.358977	0.372337	0.337569	0.384982	0.384982	0.39917	0.39917	0.472671	0.474485	0.472671
91	Schroedera_plumatellae_{clade_v}	0.502935	0.502935	0.502935	0.502935	0.502935	0.502935	0.502935	0.502935	0.502935	0.502935	0.502935	0.502935	0.502935	0.502935	0.502935	0.502935	0.502935	0.489229	0.489229	0.489229	0.489229	0.489229	0.489229	0.489229	0.489229	0.489229	0.498257	0.505363	0.505363	0.505363	0.500548	0.500548	0.421111	0.445714	0.445714	0.405455	0.361052	0.312899	0.299215	0.31161	0.318216	0.440111	0.43263	0.455484	0.455484	0.509848	0.512143	0.509848
92	Trichonosema_pectinatellae_{clade_v}	0.466049	0.466049	0.466049	0.466049	0.466049	0.466049	0.466049	0.466049	0.466049	0.466049	0.466049	0.466049	0.466049	0.466049	0.466049	0.466049	0.466049	0.461304	0.461304	0.461304	0.461304	0.461304	0.461304	0.461304	0.461304	0.461304	0.469739	0.434028	0.434028	0.434028	0.413948	0.413948	0.363142	0.37733	0.37733	0.338732	0.301504	0.251464	0.259688	0.25601	0.268147	0.371408	0.365056	0.384434	0.384434	0.445852	0.443929	0.445852
93	Amblyospora_cinerei_{clade_i}	0.494914	0.494914	0.494914	0.494914	0.494914	0.494914	0.494914	0.494914	0.494914	0.494914	0.494914	0.494914	0.494914	0.494914	0.494914	0.494914	0.494914	0.494914	0.494914	0.494914	0.494914	0.494914	0.494914	0.494914	0.494914	0.494914	0.503513	0.523065	0.523065	0.523065	0.468803	0.468803	0.456767	0.46474	0.46474	0.401643	0.413828	0.379255	0.372015	0.385151	0.358808	0.41566	0.41566	0.401954	0.401954	0.418062	0.437132	0.418062
94	Amblyospora_stimuli_{clade_i}	0.486478	0.486478	0.486478	0.486478	0.486478	0.486478	0.486478	0.486478	0.486478	0.486478	0.486478	0.486478	0.486478	0.486478	0.486478	0.486478	0.486478	0.486478	0.486478	0.486478	0.486478	0.486478	0.486478	0.486478	0.486478	0.486478	0.494914	0.523065	0.523065	0.523065	0.460903	0.460903	0.448939	0.456767	0.456767	0.394611	0.406672	0.372687	0.372015	0.378528	0.341432	0.401954	0.401954	0.388708	0.388708	0.410968	0.422692	0.410968
95	Amblyospora_khaliulini_{clade_i}	0.467608	0.467608	0.467608	0.467608	0.467608	0.467608	0.467608	0.467608	0.467608	0.467608	0.467608	0.467608	0.467608	0.467608	0.467608	0.467608	0.467608	0.467608	0.467608	0.467608	0.467608	0.467608	0.467608	0.467608	0.467608	0.467608	0.475581	0.460903	0.460903	0.460903	0.43629	0.43629	0.439043	0.448939	0.448939	0.379255	0.399639	0.379255	0.378528	0.385151	0.371408	0.375897	0.375897	0.363502	0.363502	0.402564	0.410157	0.402564
96	Amblyospora_stictici_{clade_i}	0.462105	0.462105	0.462105	0.462105	0.462105	0.462105	0.462105	0.462105	0.462105	0.462105	0.462105	0.462105	0.462105	0.462105	0.462105	0.462105	0.462105	0.462105	0.462105	0.462105	0.462105	0.462105	0.462105	0.462105	0.462105	0.462105	0.470078	0.463384	0.463384	0.463384	0.430701	0.430701	0.426291	0.426291	0.426291	0.374226	0.366229	0.372687	0.377273	0.378528	0.35266	0.383205	0.383205	0.383205	0.383205	0.418062	0.429848	0.418062
97	Amblyospora_crenifera_{clade_i}	0.433705	0.433705	0.433705	0.433705	0.433705	0.433705	0.433705	0.433705	0.433705	0.433705	0.433705	0.433705	0.433705	0.433705	0.433705	0.433705	0.433705	0.426291	0.426291	0.426291	0.426291	0.426291	0.426291	0.426291	0.426291	0.426291	0.433705	0.442469	0.442469	0.442469	0.410968	0.410968	0.413828	0.428525	0.428525	0.362775	0.387699	0.387699	0.386784	0.393636	0.367659	0.383205	0.383205	0.370394	0.370394	0.385151	0.391113	0.385151
98	Amblyospora_ferocious_{clade_i}	0.410968	0.410968	0.410968	0.410968	0.410968	0.410968	0.410968	0.410968	0.410968	0.410968	0.410968	0.410968	0.410968	0.410968	0.410968	0.410968	0.410968	0.418062	0.418062	0.418062	0.418062	0.418062	0.418062	0.418062	0.418062	0.418062	0.425282	0.392728	0.392728	0.392728	0.384434	0.384434	0.386784	0.409965	0.409965	0.332143	0.344438	0.358977	0.35803	0.364597	0.327465	0.355552	0.361957	0.355552	0.355552	0.362775	0.363655	0.362775
99	Amblyospora_indicola_{clade_i}	0.44553	0.44553	0.44553	0.44553	0.44553	0.44553	0.44553	0.44553	0.44553	0.44553	0.44553	0.44553	0.44553	0.44553	0.44553	0.44553	0.44553	0.43263	0.43263	0.43263	0.43263	0.43263	0.43263	0.43263	0.43263	0.43263	0.440111	0.462105	0.462105	0.462105	0.417189	0.417189	0.388681	0.409965	0.409965	0.357143	0.381828	0.3656	0.364597	0.371277	0.326143	0.401417	0.401417	0.388281	0.388281	0.399639	0.405711	0.399639
100	Hyalinocysta_chapmani_{clade_i}	0.485051	0.485051	0.485051	0.485051	0.485051	0.485051	0.485051	0.485051	0.485051	0.485051	0.485051	0.485051	0.485051	0.485051	0.485051	0.485051	0.485051	0.479631	0.479631	0.479631	0.479631	0.479631	0.479631	0.479631	0.479631	0.479631	0.487987	0.479368	0.479368	0.479368	0.441675	0.441675	0.419981	0.489869	0.489869	0.374641	0.402746	0.350738	0.338971	0.345219	0.361957	0.401417	0.394794	0.401417	0.401417	0.429848	0.442056	0.429848
101	Amblyospora_opacita_{clade_i}	0.43263	0.43263	0.43263	0.43263	0.43263	0.43263	0.43263	0.43263	0.43263	0.43263	0.43263	0.43263	0.43263	0.43263	0.43263	0.43263	0.43263	0.425282	0.425282	0.425282	0.425282	0.425282	0.425282	0.425282	0.425282	0.425282	0.43263	0.456767	0.456767	0.456767	0.424345	0.424345	0.368469	0.370278	0.370278	0.326143	0.357143	0.357143	0.356317	0.362775	0.349252	0.402564	0.402564	0.389205	0.389205	0.385934	0.380047	0.385934
102	Edhazardia_aedis_{clade_i}	0.491982	0.491982	0.491982	0.491982	0.491982	0.491982	0.491982	0.491982	0.491982	0.491982	0.491982	0.491982	0.491982	0.491982	0.491982	0.491982	0.491982	0.491982	0.491982	0.491982	0.491982	0.491982	0.491982	0.491982	0.491982	0.491982	0.500417	0.493407	0.493407	0.493407	0.451119	0.451119	0.439043	0.446591	0.446591	0.392728	0.388708	0.372687	0.383785	0.378528	0.346612	0.454715	0.454715	0.440276	0.440276	0.429071	0.435525	0.429071
103	Berwaldia_schaefernai_{clade_i}	0.485055	0.485055	0.485055	0.485055	0.485055	0.485055	0.485055	0.485055	0.485055	0.485055	0.485055	0.485055	0.485055	0.485055	0.485055	0.485055	0.485055	0.463179	0.463179	0.463179	0.463179	0.463179	0.463179	0.463179	0.463179	0.463179	0.471696	0.448414	0.448414	0.448414	0.420005	0.420005	0.364617	0.401376	0.401376	0.330921	0.314189	0.305921	0.304935	0.304935	0.316098	0.425282	0.425282	0.425282	0.425282	0.364597	0.377015	0.364597
104	Hazardia_milleri_{clade_i}	0.461071	0.461071	0.461071	0.461071	0.461071	0.461071	0.461071	0.461071	0.461071	0.461071	0.461071	0.461071	0.461071	0.461071	0.461071	0.461071	0.461071	0.440168	0.440168	0.440168	0.440168	0.440168	0.440168	0.440168	0.440168	0.440168	0.448068	0.426161	0.426161	0.426161	0.364597	0.364597	0.314189	0.348136	0.348136	0.292283	0.300777	0.275385	0.27897	0.274724	0.290752	0.395828	0.395828	0.382692	0.382692	0.342452	0.343054	0.342452
105	Parathelohania_anophelis_{clade_i}	0.493407	0.493407	0.493407	0.493407	0.493407	0.493407	0.493407	0.493407	0.493407	0.493407	0.493407	0.493407	0.493407	0.493407	0.493407	0.493407	0.493407	0.463384	0.463384	0.463384	0.463384	0.463384	0.463384	0.463384	0.463384	0.463384	0.471432	0.462655	0.462655	0.462655	0.408799	0.408799	0.370278	0.4125	0.4125	0.344438	0.341512	0.312493	0.307362	0.305868	0.311012	0.494159	0.494159	0.478211	0.478211	0.450222	0.449405	0.450222
106	Rozella_allomycis_{Rozella}	0.502917	0.502917	0.502917	0.502917	0.502917	0.502917	0.502917	0.502917	0.502917	0.502917	0.502917	0.502917	0.502917	0.502917	0.502917	0.502917	0.502917	0.498493	0.498493	0.498493	0.498493	0.498493	0.498493	0.498493	0.498493	0.498493	0.507887	0.403237	0.403237	0.403237	0.43532	0.43532	0.378434	0.425435	0.425435	0.360644	0.401376	0.480792	0.487454	0.487454	0.484681	0.536409	0.527015	0.555778	0.555778	0.664561	0.655922	0.664561
107	Rozella_sp._JEL347_{Rozella}	0.461304	0.461304	0.461304	0.461304	0.461304	0.461304	0.461304	0.461304	0.461304	0.461304	0.461304	0.461304	0.461304	0.461304	0.461304	0.461304	0.461304	0.456691	0.456691	0.456691	0.456691	0.456691	0.456691	0.456691	0.456691	0.456691	0.465127	0.413211	0.413211	0.413211	0.39885	0.39885	0.345411	0.395551	0.395551	0.332164	0.384614	0.496754	0.498493	0.494189	0.514852	0.549124	0.539635	0.539635	0.539635	0.660877	0.652273	0.660877
[truncated: 59 more columns]

## Sheet: Caption
Table. Estimates of Evolutionary Divergence between Sequences
The number of base substitutions per site from between sequences are shown. Standard error estimate(s) are shown above the diagonal. Analyses were conducted using the Kimura 2-parameter model [1]. The rate variation among sites was modeled with a gamma distribution (shape parameter = 1). The analysis involved 107 nucleotide sequences. All positions containing gaps and missing data were eliminated…
1. Kimura M. (1980). A simple method for estimating evolutionary rate of base substitutions through comparative studies of nucleotide sequences. Journal of Molecular Evolution 16:111-120.
2. Tamura K., Stecher G., Peterson D., Filipski A., and Kumar S. (2013). MEGA6: Molecular Evolutionary Genetics Analysis version 6.0. Molecular Biology and Evolution30: 2725-2729.
Disclaimer: Although utmost care has been taken to ensure the correctness of the caption, the caption text is provided "as is" without any warranty of any kind. Authors advise the user to carefully check the caption prior to its use for any purpose and report any errors or problems to the authors immediately (www.megasoftware.net). In no event shall the authors and their employers be liable for a…
