# Supplementary material for: A Large Collection of Novel Nematode-Infecting Microsporidia and Their Diverse Interactions with Caenorhabditis elegans and Other Related Nematodes
Source: PLoS Pathog. 2016 Dec 12;12(12):e1006093. doi: 10.1371/journal.ppat.1006093 (PMC5179134; doi:10.1371/journal.ppat.1006093)
Supplement: S3 Table — (XLSX) [file ppat.1006093.s010.xlsx]

## Sheet: 1st assay
ERT54	10 L4 larvae of ERT54, grow two days with:	3dpi:GFP	3dpi:infection symptoms	8dpi:GFP	14dpi: GFP
	C. elegans strain JU1762 with N. parisii infection	positive	spores	positive	positive
	C. elegans strain JU1348 with N. ausubeli infection	negative	spores	negative	negative
	C. briggsae strain JU2507 with N. major infection	positive	spores	positive	positive
	O. tipulae strain JU1504 with N. homosporus infection	positive	spores	positive	positive
	R. typhae strain NIC516 with N. homosporus infection	positive	spores	positive	positive
	O. tipulae strain JU1483 with Enteropsectra infection	positive	no symptoms	negative	negative
	Oscheius sp. 3 strain JU408 with E. longa infection	positive	no symptoms	negative (very few old worms showing only weak GFP)	negative
	Control: culture of ERT54	negative	no symptoms	negative	negative

## Sheet: 2nd assay
		Worms expressing GFP / total scored (with Cherry marker)					Infection symptom scored by DIC
ERT54	10 L4, grow three days with:	2hpi	4hpi	8hpi	28hpi	48hpi	48hpi
	C. briggsae strain JU2055 with N. parisii infection	9/50	10/50	18/50	46/50	43/50	Meronts
	C. elegans strain JU2009 with N. ausubeli infection	2/50	1/50	1/50	7/50	2/50	Spores
	C. briggsae strain JU2507 with N. major infection	1/50	4/50	20/50	45/50	45/50	Meronts
	R. typhae strain NIC516 with N. homosporus infection	1/50	0/50	15/50	42/50	50/50	Meronts
	Oscheius sp. 3 strain JU408 with E. longa infection	0/50	0/50	2/50	0/50	4/50	no symptom
	uninfected C. elegans reference strain N2 (as negative control)	0/50	1/50	0/50	0/50	0/50	no symptom
ERT72	10 L4, grow three days with:	2hpi	4hpi	8hpi	28hpi	48hpi
	C. briggsae strain JU2055 with N. parisii infection	19/50	24/50	30/50	50/50	47/47	Meronts
	C. elegans strain JU2009 with N. ausubeli infection	13/50	11/48	6/50	14/50	10/49	Meronts
	C. briggsae strain JU2507 with N. major infection	5/30	15/31	18/30	35/35	32/32	Meronts
	R. typhae strain NIC516 with N. homosporus infection	12/45	2/50	29/50	44/50	49/50	Meronts
	Oscheius sp. 3 strain JU408 with E. longa infection	0/35	0/37	0/33	2/32	4/42	no symptom
	uninfected C. elegans reference strain N2 (as negative control)	0/51	1/50	2/50	0/50	1/50	no symptom
